# Supplementary material for: Ubiquitin-dependent recruitment of SLFN11 to chromatin is regulated by deubiquitinase (DUB) and RNF168
Source: Research Square preprint supplement (doi:10.21203/rs.3.rs-9297013/v1), 2026-04-10
Supplement: Supplementary file 1 [file 405cc1bb9e0e80f8e11ef6fe.xlsx]

## Sheet: Sheet1
Rank	Compounds	Development phase	Mechanism of Action	Intensity ratio 0.1 µM	Intensity ratio 1 µM	Intensity ratio 10 µM	Average Intensity Ratio
1	VLX-1570	Phase I/II	Ubiquitin Carboxyl-Terminal Hydrolase isozyme L5 Inhibitor	1.35669	1.96391	19.9911	7.77055
2	Doxorubicin	Approved	DNA Topoisomerase II Inhibitor	1.37259	1.92113	16.9758	6.75651
3	PR-619	Preclinical	Non-selective deubiquitinating enzyme (DUB) inhibitor	1.02788	8.29372	9.28159	6.20106
4	WP1130	Preclinical	Multiple DUB inhibitor	1.29096	1.27671	13.2221	5.26325
5	Prexasertib	Phase II	Checkpoint kinase 1 Inhibitor	2.11116	2.29096	1.88905	2.09706
6	Camptothecin	Derivatives approved	DNA Topoisomerase I Inhibitor	2.15352	2.17172	1.9404	2.08855
7	AZD-7762	Discontinued	Checkpoint kinase 1 Inhibitor	1.26785	2.24403	2.70885	2.07358
8	BAY11-7082	Preclinical	Ubiquitin Carboxy-Terminal Hydrolase 7/21 Inhibitor	1.2436	1.41149	1.63484	1.42998
9	Gemcitabine	Approved	DNA Polymerase Inhibitor	1.21282	1.41269	1.61553	1.41368
10	Vismodegib	Approved	Smoothened Receptor Antagonist	1.30072	1.50909	1.41952	1.40978
11	Triapine	Phase II	Ribonucleoside-Diphosphate Reductase Inhibitor	1.26013	1.23969	1.7221	1.40731
12	A-485	Preclinical	CREB-Binding Protein Inhibitor	1.25086	1.48225	1.43044	1.38785
13	AZD-7648	Phase I/II	DNA-Dependent Protein Kinase Inhibitor	1.24446	1.41768	1.49013	1.38409
14	Adavosertib	Phase II	Wee1-like protein kinase Inhibitor	1.29697	1.44993	1.40331	1.38341
15	LLY-507	Preclinical	Sphingomyelin phosphodiesterase 2 Inhibitor	1.3996	1.45088	1.30208	1.38419
16	Raltitrexed	Approved	Thymidylate Synthase Inhibitor	1.39381	1.4416	1.29869	1.37803
17	XL-413	Phase I/II	Cell Division Cycle 7-Related Protein Kinase Inhibitor	1.2497	1.50683	1.36784	1.37479
18	Apaziquone	Pre-registered	DNA Alkylating Drugs	1.1965	1.53308	1.38807	1.37255
19	Fludarabine	Approved	DNA Polymerase Inhibitor	1.24218	1.46056	1.38702	1.36325
20	Dienogest	Approved	Progesterone Receptor Agonist	1.38659	1.37516	1.32918	1.36364
21	LDN57444	Preclinical	Ubiquitin Carboxyl-Terminal Hydrolase isozyme L1 Inhibitor	1.26463	1.29257	1.31883	1.29201
22	Etoposide	Approved	DNA Topoisomerase II Inhibitor	1.20317	1.18461	1.67847	1.35542
23	TT-10	Phase I	TEAD1 protein palmitoylation activator	1.30242	1.37266	1.37871	1.35127
24	Umbralisib	Phase III	Casein Kinase 1 epsilon Inhibitor	1.28371	1.35777	1.38598	1.34248
25	Spautin-1	Preclinical	Ubiquitin Carboxy-Terminal Hydrolase 10/13 Inhibitor	1.3763	1.35505	1.29713	1.34283
26	Risdiplam	Pre-registered	SMN2 Splicing Modulator	1.25017	1.36863	1.39593	1.33824
27	TH-287	Preclinical	7,8-Dihydro-8-Oxoguanine Triphosphatase Inhibitor	1.50709	1.25133	1.24922	1.33588
28	WP-1066	Phase I	Signal Transducer and Activator of Transcription 3 Inhibitor	1.32546	1.38086	1.26965	1.32532
29	KI-696	Preclinical	Nuclear Factor Erythroid 2-Related Factor 2 Inhibitor	1.28407	1.35604	1.29693	1.31235
30	BI-9321	Preclinical	Nuclear Receptor Binding SET Domain Protein 3 antagonist	1.31277	1.37566	1.24142	1.30995
31	PDD-00017272	Preclinical	poly(ADP-ribose) Glycohydrolase (PARG) Inhibitor	1.3575	1.35486	1.18441	1.29893
32	Tazemetostat	Phase II	Histone-lysine N-methyltransferase EZH2 Inhibitor	1.30966	1.32064	1.25687	1.29572
33	Mifepristone	Approved	Progesterone Receptor Antagonist	1.3277	1.32366	1.2352	1.29552
34	BAZ2-ICR	Preclinical	Bromodomain adjacent to zinc finger domain protein 2B Inhibitor	1.29792	1.34012	1.24351	1.29385
35	Imexon	Phase II	Ribonucleoside-Diphosphate Reductase Inhibitor	1.32536	1.36829	1.15717	1.2836
36	Vincristine	Approved	Tubulin polymerization Inhibitor	1.22093	1.3667	1.25615	1.28126
37	Pladienolide B	Preclinical	Splicing Factor SF3b Modulator	1.31216	1.27233	1.25469	1.27973
38	CX-5461	Phase I/II	DNA-Directed RNA Polymerase Inhibitor	1.25343	1.30354	1.26676	1.27458
39	PFI-3	Preclinical	Transcription activator BRG1 Inhibitor	1.30571	1.27604	1.21814	1.26663
40	LY-2334737	Phase I	Ribonucleoside-Diphosphate Reductase Inhibitor	1.27672	1.24052	1.26267	1.25997
41	CC-885	Preclinical	Cereblon Inhibitor	1.31747	1.2834	1.16856	1.25648
42	VT-107	Preclinical	TEAD1 protein palmitoylation inhibitor	1.30626	1.2567	1.203	1.25532
43	EPZ-020411	Preclinical	Protein arginine N-methyltransferase 6 Inhibitor	1.27195	1.27126	1.21439	1.25253
44	Smurf1-IN-A01	Preclinical	Smurf1-mediated Smad1/5 degradation	1.28118	1.23648	1.2398	1.25249
45	FX-9847	Preclinical	Dual-Specificity Tyrosine-(Y)-Phosphorylation Regulated Kinase 1A Inhibitor	1.24808	1.31901	1.18567	1.25092
46	Elafibranor	Phase III	Peroxisome proliferator-activated receptor alpha Agonist	1.28504	1.21984	1.24827	1.25105
47	RIN1	Preclinical	Recombination signal binding protein for immunoglobulin kappa J region (RBPJ) Inhibitor	1.37686	1.22092	1.15479	1.25086
48	NCGC00378430	Preclinical	SIX1/EYA2 complex Inhibitor	1.21472	1.33509	1.19344	1.24775
49	Glasdegib	Pre-registered	Smoothened Receptor Antagonist	1.31121	1.22663	1.2078	1.24855
50	Nedisertib	Phase I/II	DNA-Dependent Protein Kinase Inhibitor	1.26059	1.27918	1.20149	1.24709
51	NVP-XAV-939	Preclinical	Tankyrase-1 Inhibitor	1.33301	1.18018	1.22315	1.24545
52	Bexarotene	Approved	Retinoic Acid Receptor RXR-alpha Agonist	1.26197	1.2844	1.18198	1.24278
53	Nicotinamide Riboside	Approved	Nicotinamide phosphoribosyltransferase Inhibitor	1.24837	1.27727	1.19926	1.24163
54	CPI-4203	Preclinical	Lysine-specific demethylase 5A Inhibitor	1.28743	1.2231	1.20952	1.24002
55	MS023	Preclinical	Protein Arginine N-Methyltransferase 8 Inhibitor	1.30586	1.1836	1.22851	1.23932
56	Pemetrexed	Approved	Thymidylate Synthase Inhibitor	1.2981	1.19239	1.22009	1.23686
57	EPZ-031686	Preclinical	Sphingomyelin phosphodiesterase 3 Inhibitor	1.25256	1.24685	1.20095	1.23345
58	Eltanexor	Phase I/II	Exportin-1 Antagonist	1.25184	1.26673	1.17932	1.23263
59	Floxuridine	Approved	Thymidylate Synthase Inhibitor	1.24325	1.23627	1.17988	1.2198
60	Edaravone	Approved	5'-Nucleotidase Inhibitor	1.25603	1.22239	1.18009	1.2195
61	KSQ-4279	Phase I	USP1/UAF1 complex inhibitor	1.39771	1.18119	1.08354	1.22081
62	Lurbinectedin	Phase III	DNA-Directed RNA Polymerase Inhibitor	1.20174	1.31899	1.12816	1.2163
63	Volasertib	Phase III	Serine/threonine-protein kinase PLK1 Inhibitor	1.28326	1.22289	1.14058	1.21558
64	PX-12	Phase II	Thioredoxin Reductase Inhibitor	1.2694	1.2239	1.14805	1.21378
65	Tazarotene	Approved	Retinoic Acid Receptor gamma Agonist	1.25978	1.19569	1.17947	1.21165
66	EZM-0414	Preclinical	Histone-Lysine N-Methyltransferase SETD2 Inhibitor	1.26607	1.17774	1.18761	1.21047
67	Palbociclib	Phase I	Cyclin-Dependent Kinase 6 Inhibitor	1.25089	1.18625	1.19277	1.20997
68	SRT-3025	Phase I	NAD-Dependent Protein Deacetylase Sirtuin-1 Activator	1.19986	1.14966	1.27684	1.20879
69	CPI-637	Preclinical	Histone Acetyltransferase p300 Inhibitor	1.22259	1.21669	1.18476	1.20801
70	JH-RE-06	Preclinical	DNA Polymerase Rev1/DNA Polymerase zeta Interaction Inhibitor	1.12929	1.27239	1.21418	1.20528
71	Pemafibrate	Approved	Peroxisome proliferator-activated receptor alpha Modulator	1.22532	1.17335	1.2203	1.20632
72	Prednisolone	Approved	Glucocorticoid Receptor Agonist	1.25182	1.20054	1.16472	1.20569
73	Triptolide	Clinical	dCTP Pyrophosphatase 1 Inhibitor	1.2331	1.18492	1.19255	1.20353
74	Ibiglustat	Phase II	Ceramide Glucosyltransferase Inhibitor	1.31124	1.14168	1.14406	1.19899
75	Iadademstat	Phase I/II	Lysine-Specific Histone Demethylase 1A Inhibitor	1.24397	1.15441	1.19494	1.19778
76	LY-2584702	Phase I	Ribosomal Protein S6 Kinase beta-1 Inhibitor	1.23392	1.17539	1.18375	1.19769
77	FdCyd	Phase II	DNA Methyltransferase (DNMT) Inhibitor	1.24348	1.15693	1.18678	1.19573
78	SRT-2104	Phase II	NAD-Dependent Protein Deacetylase Sirtuin-1 Activator	1.22741	1.20734	1.15217	1.19564
79	Berzosertib	Phase II	Serine-protein kinase ATR Inhibitor	1.27327	1.15403	1.15479	1.19403
80	Peretinoin	Phase III	Retinoid Acid Receptor RXR-beta Ligand	1.19941	1.21618	1.16036	1.19198
81	Selisistat	Phase II	NAD-Dependent Protein Deacetylase Sirtuin-1 Inhibitor	1.19857	1.24368	1.13396	1.19207
82	YK-4-279	Preclinical	EWS-FLI1 Inhibitor	1.24423	1.18455	1.14667	1.19182
83	BI-3406	Preclinical	Son of Sevenless Homolog 1/KRAS Interaction Inhibitor	1.2169	1.1757	1.17552	1.18938
84	Decitabine	Approved	DNA Methyltransferase (DNMT) Inhibitor	1.20423	1.13559	1.22636	1.18873
85	Methotrexate	Approved	Dihydrofolate Reductase Inhibitor	1.26283	1.13537	1.1693	1.18917
86	UNC-1215	Preclinical	Lethal(3)malignant Brain Tumor-like Protein 3 Inhibitor	1.22017	1.158	1.18373	1.1873
87	Niraparib	Approved	Poly [ADP-ribose] polymerase 1 inhibitor	1.19238	1.11355	1.24889	1.18494
88	Vorasidenib	Phase III	Isocitrate Dehydrogenase [NADP] cytoplasmic (Arg132His Mutant) Inhibitor	1.20687	1.1854	1.15893	1.18373
89	GSK-2879552	Phase I/II	Lysine-Specific Histone Demethylase 1A Inhibitor	1.22928	1.22865	1.09307	1.18367
90	Pinometostat	Phase I	Histone-lysine N-methyltransferase, H3 Lysine-79 Specific Inhibitor	1.23931	1.2016	1.10687	1.1826
91	(R)-PFI-2	Preclinical	Histone-lysine N-methyltransferase SETD7 Inhibitor	1.21577	1.1996	1.13013	1.18183
92	Fenretinide	Phase II	Retinoic Acid Receptor gamma Agonist	1.25467	1.13896	1.14929	1.18097
93	Citarinostat	Phase I	Histone deacetylase 6, class IIB Inhibitor	1.21092	1.17208	1.15727	1.18009
94	Sapacitabine	Phase III	DNA-Directed DNA Polymerase Inhibitor	1.23512	1.13705	1.16853	1.18024
95	IU1-47	Preclinical	Ubiquitin Carboxy-Terminal Hydrolase 14 Inhibitor	1.32887	1.12154	1.09433	1.18158
96	UNC-0646	Preclinical	Histone-lysine N-methyltransferase EHMT2 Inhibitor	1.19786	1.21381	1.12469	1.17879
97	Crenigacestat	Phase I/II	Notch Signaling Inhibitor	1.26663	1.13849	1.12806	1.17773
98	PFI-4	Preclinical	Bromodomain and PHD finger containing 1 Inhibitor	1.20562	1.17868	1.14522	1.17651
99	Rosiglitazone	Approved	Peroxisome proliferator-activated receptor gamma Agonist	1.21428	1.17045	1.14272	1.17582
100	Paclitaxel	Approved	Microtubule-Stabilizing Agents	1.2368	1.1839	1.10797	1.17623
101	8-Cl-Ado	Phase I/II	Telomerase reverse transcriptase Inhibitor	1.37489	1.08949	1.06544	1.17661
102	Pralatrexate	Approved	Dihydrofolate Reductase Inhibitor	1.21792	1.18965	1.11402	1.17387
103	Dexamethasone	Approved	Glucocorticoid Receptor Agonist	1.18578	1.23501	1.09488	1.17189
104	BI-1347	Preclinical	Cyclin-Dependent Kinase 8 Inhibitor	1.22339	1.18363	1.10004	1.16902
105	Robotnikinin	Preclinical	Sonic Hedgehog protein Inhibitor	1.21049	1.17414	1.11698	1.1672
106	TAME	Preclinical	E3 Ubiquitin-Protein Ligase Inhibitor	1.20363	1.15045	1.14354	1.16587
107	MAK-683	Phase I/II	Histone-lysine N-methyltransferase EZH2 Inhibitor	1.20584	1.10435	1.17565	1.16194
108	2-Fluoroadenosine	Preclinical	Cytosolic Purine 5'-Nucleotidase Inhibitor	1.18457	1.16419	1.13229	1.16035
109	SNDX-5613	Phase I/II	Menin/MLL Interaction inhibitor	1.22044	1.11414	1.14617	1.16025
110	SMN-C3	Phase I	SMN2 Splicing Modulator	1.20677	1.14207	1.12691	1.15858
111	GSK-3326595	Phase I	Protein arginine N-methyltransferase 5 Inhibitor	1.20686	1.1105	1.15056	1.15598
112	WM-8014	Preclinical	Histone Acetyltransferase KAT6B (MOZ2; MYST-4) Inhibitor	1.10964	1.03224	1.30619	1.14935
113	Tamibarotene	Approved	Retinoic Acid Receptor alpha Antagonist	1.19735	1.15821	1.09571	1.15042
114	Eflornithine	Approved	Ornithine Decarboxylase Inhibitor	1.17242	1.18438	1.09304	1.14995
115	K-975	Preclinical	YAP/TEAD1 interaction inhibitor	1.17921	1.12706	1.13571	1.14733
116	Defactinib	Phase II	Focal Adhesion Kinase Inhibitor	1.19755	1.10427	1.14	1.14727
117	Dinaciclib	Phase III	Cyclin-Dependent Kinase 12 Inhibitor	1.1739	1.23476	1.02856	1.14574
118	TRULI	Preclinical	Large tumor suppressor kinase 1 (LATS1) Inhibitor	1.17318	1.11633	1.14155	1.14369
119	PTC-596	Phase I	Polycomb Complex Protein BMI-1 Inhibitor	1.2243	1.12954	1.07593	1.14326
120	Tetrahydrouridine	Phase II	Cytidine Deaminase Inhibitor	1.16947	1.09063	1.16652	1.1422
121	AZD-1390	Phase I	ATM Kinase Inhibitor	1.20348	1.14029	1.0848	1.14286
122	Talazoparib	Approved	Poly [ADP-ribose] polymerase 1 inhibitor	1.17057	1.12822	1.12195	1.14025
123	Belzutifan	Phase III	Hypoxia-inducible factor 2-alpha Inhibitor	1.18573	1.17069	1.0646	1.14034
124	Mifobate	Phase II	Peroxisome proliferator-activated receptor gamma Antagonist	1.1914	1.09353	1.12929	1.13807
125	GSK-2981278	Discontinued	Nuclear receptor ROR-gamma Inverse Agonist	1.17329	1.1089	1.12408	1.13543
126	Zotatifin	Phase I/II	Eukaryotic translation initiation factor 4A Inhibitor	1.12766	1.13348	1.13997	1.1337
127	OSMI-4a	Preclinical	beta-O-linked-N-acetylglucosamine Transferase Inhibitor	1.18269	1.12381	1.09668	1.13439
128	Cladribine	Approved	DNA Polymerase Inhibitor	1.20927	1.07988	1.11091	1.13335
129	MYCi975	Preclinical	Myc proto-oncogene protein Expression Inhibitor	1.16248	1.1698	1.06637	1.13288
130	CFI-400945	Phase I	Serine/threonine-protein kinase PLK4 Inhibitor	1.16257	1.11583	1.10905	1.12915
131	Nelarabine	Approved	DNA Polymerase Inhibitor	1.10962	1.03921	1.23483	1.12788
132	Iberdomide	Phase II	Cereblon Inhibitor	1.18762	1.10932	1.08607	1.12767
133	Pentostatin	Approved	Adenosine Deaminase Inhibitor	1.17182	1.10184	1.1084	1.12735
134	MRTX-1719	Phase I	Protein arginine N-methyltransferase 5 Inhibitor	1.16664	1.1077	1.10725	1.1272
135	Panobinostat	Approved	Histone deacetylase 1, class I Inhibitor	1.12843	1.16706	1.08009	1.12519
136	DS18561882	Preclinical	Methylene tetrahydrofolate dehydrogenase 2 inhibitor	1.16508	1.08942	1.11774	1.12408
137	Carfilzomib	Approved	Proteasome Inhibitor	1.14028	1.12098	1.10708	1.12278
138	ML-364	Preclinical	Ubiquitin Carboxyl-Terminal Hydrolase 2 Inhibitor	1.21198	1.08292	1.0726	1.1225
139	SJG-136	Phase II	DNA Alkylating Drugs	1.09683	1.13627	1.11575	1.11628
140	PHA-690509	Phase I	Cyclin-Dependent Kinase 2 Inhibitor	1.18347	1.04833	1.11045	1.11408
141	CPI-1205	Phase I/II	Histone-lysine N-methyltransferase EZH2 Inhibitor	1.14118	1.11405	1.08205	1.11243
142	CPI-455	Preclinical	Lysine-Specific Demethylase 5B Inhibitor	1.14771	1.07147	1.11325	1.11081
143	Hydroxyurea	Approved	Ribonucleoside-Diphosphate Reductase Inhibitor	1.21503	1.07881	1.04178	1.11188
144	ART-558	Phase I	DNA-Directed DNA Polymerase Theta Inhibitor	1.15452	1.09769	1.08041	1.11087
145	LY-345899	Preclinical	Methylene tetrahydrofolate dehydrogenase 1 inhibitor	1.15906	1.09844	1.07008	1.10919
146	NVS-BPTF-1	Preclinical	Nucleosome-remodeling factor Modulator	1.14053	1.08734	1.07618	1.10135
147	Napabucasin	Phase III	Signal Transducer and Activator of Transcription 3 Inhibitor	1.20088	1.06804	1.03483	1.10125
148	BD98	Preclinical	BRG1 (SWI/SNF) Inhibitor	1.22545	1.02956	1.03291	1.09597
149	PDD-00017238	Preclinical	poly(ADP-ribose) Glycohydrolase (PARG) Inhibitor	1.17486	1.06864	1.02396	1.08915
150	VIP-152	Phase I	Cyclin-Dependent Kinase 9 Inhibitor	1.1511	1.01816	1.09224	1.08717
151	Pevonedistat	Phase III	NEDD8-Activating Enzyme E1 Inhibitor	1.13918	1.06383	1.05353	1.08551
152	GSK-4027	Preclinical	Histone Acetyltransferase KAT2A Inhibitor	1.11341	1.0719	1.06066	1.08199
153	Branaplam	Phase II	SMN2 Splicing Modulator	1.09728	1.05188	1.09121	1.08012
154	Methylthio-DADMe-immucillin-A	Preclinical	S-methyl-5'-thioadenosine phosphorylase Inhibitor	1.11161	1.0732	1.04287	1.0759
155	C-188-9	Phase I	Signal Transducer and Activator of Transcription 3 Inhibitor	1.12503	1.02845	1.06766	1.07372
156	AS-1842856	Preclinical	Forkhead Box Protein O1 (FOXO1) Inhibitor	1.09946	1.04999	1.04722	1.06556
157	CPI-0610	Phase II	Bromodomain-Containing Protein 4 (Brd4) Inhibitor	1.12611	1.00479	1.05927	1.06339
158	GNE-6640	Preclinical	Ubiquitin Carboxy-Terminal Hydrolase 7 Inhibitor	1.17623	1.01281	1.00029	1.06311
159	NVP-AUY922	Phase II	Heat Shock Protein 90 (Hsp90) Inhibitor	1.08302	1.04639	1.03254	1.05398
160	MK-8719	Phase I	N-Acetyl-beta-D-Glucosaminidase (O-GlcNAcase, OGA) Inhibitor	1.08733	0.979043	1.04998	1.03878
161	Adavivint	Phase III	Dual-Specificity Tyrosine-(Y)-Phosphorylation Regulated Kinase 1A Inhibitor	1.07537	0.973429	1.04094	1.02991
162	Inobrodib	Phase I/II	CREB-Binding Protein Inhibitor	1.04793	0.990101	1.03987	1.02596
163	No drug			1	1	1	1
