# Supplementary material for: Ubiquitin-dependent recruitment of SLFN11 to chromatin is regulated by deubiquitinase (DUB) and RNF168
Source: Research Square preprint supplement (doi:10.21203/rs.3.rs-9297013/v1), 2026-04-10
Supplement: Supplementary file 2 [file 49ff22f91c9e73be122a313f.xlsx]

## Sheet: Sheet1
	pcDNA3-SLFN11-Flag	Jo et. al., PNAS 2021
	pcDNA3-HA-RNF168	cDNA RNF168 (pCMV-SPORT6 RNF168; #HsCD00334902)
	5RNF168 BglII/aa2	GCTA AGA TCT GCT CTA CCC AAA GAC GCC
	3RNF168 Stop/XhoI	GCGC CTC GAG TCA CTT TGT GCA TCT CTG AAA
	SLFN11 KR mutants
	5SLFN11 K890R	TG GCT TCC AGG GCA AgA CAA CAC CTG TAT AT
	3SLFN11 K890R	AT ATA CAG GTG TTG TCT TGC CCT GGA AGC CA
	5SLFN11 K390/391R	AA GGC CTG GAA CAT AgA AgG GAA CTC CAG CAA CT
	3SLFN11 K390/391R	AG TTG CTG GAG TTC CCT TCT ATG TTC CAG GCC TT
	5SLFN11 K743R	CC AAG TAC TTA CAA AgA GAA ATG CAA GTA AT
	3SLFN11 K743R	AT TAC TTG CAT TTC TCT TTG TAA GTA CTT GG
	5SLFN11 K823R	AA GTG GAG CAC TAT AgG TAT GAG CTC TTG AA
	3SLFN11 K823R	TT CAA GAG CTC ATA CCT ATA GTG CTC CAC TT
	5SLFN11 K36R	GA AAA AAG CTG CAG AgA ATT CAG AGA GAC CA
	3SLFN11 k36R	TG GTC TCT CTG AAT TCT CTG CAG CTT TTT TC
	5SLFN11 K429R	AG GAG TTA ATA AAT AgG CAA ATG CAA CCT TT
	3SLFN11 k429R	AA AGG TTG CAT TTG CCT ATT TAT TAA CTC CT
	5SLFN11 K828R	AG TAT GAG CTC TTG AgA GCA ATG AGG AAG AA
	3SLFN11 K828R	TT CTT CCT CAT TGC TCT CAA GAG CTC ATA CT
	pCI-His-hUbi	Addgene: Plasmid #31815
	pCi-His-hUbi K48R	TG ATC TTT GCT GGG AgA CAG CTG GAA GAT GG
		CC ATC TTC CAG CTG TCT CCC AGC AAA GAT CA
	pCI-His-hUbi K63R	AC TAC AAC ATC CAG AgA GAG TCC ACC CTG CA
		TG CAG GGT GGA CTC TCT CTG GAT GTT GTA GT
	pCi-His-hUbi K6R	AT CAG ATC TTC GTG AgG ACC CTG ACT GGT AA
		TT ACC AGT CAG GGT CCT CAC GAA GAT CTG AT
	pCi-His-hUbi K11R	AG ACC CTG ACT GGT AgG ACC ATC ACT CTC GA
		TC GAG AGT GAT GGT CCT ACC AGT CAG GGT CT
	pCi-His-hUbi K27R	CC ATT GAG AAT GTC AgG GCA AAG ATC CAA GA
		TC TTG GAT CTT TGC CCT GAC ATT CTC AAT GG
	pCi-His-hUbi K29R	AG AAT GTC AAG GCA AgG ATC CAA GAC AAG GA
		TC CTT GTC TTG GAT CCT TGC CTT GAC ATT CT
	pCi-His-hUbi K33R	CA AAG ATC CAA GAC AgG GAA GGC ATC CCT CC
		GG AGG GAT GCC TTC CCT GTC TTG GAT CTT TG
