# Supplementary material for: Ubiquitin-dependent recruitment of SLFN11 to chromatin is regulated by deubiquitinase (DUB) and RNF168
Source: Research Square preprint supplement (doi:10.21203/rs.3.rs-9297013/v1), 2026-04-10
Supplement: Supplementary file 3 [file a243f544a1b480218b09e244.xlsx]

## Sheet: Sheet1
			reference
	si RNF168
	siRNF168-1	GAC ACU UUC UCC ACA GAU A	Francesca Mattiroli, Cell 150, 1182–1195, September 14, 2012
	siRNF168-3	AGA AGA ACA GGA CAG GUU A	Francesca Mattiroli, Cell 150, 1182–1195, September 14, 2012
	siRNF168-5	CGU GGA ACU GUG GAC GAU AAU UCA A	Marco Gatti, cell reports 2015
	siUSP14		Becirovic T, Cell Death Discovery. 2024;10(1):342.
	siUSP14-07	GACAAAGUCAGCAUCGUAA
	siUSP14-08	GCAUAUCGCUUACGUUCUA
	siUSP14-09	GAGGAACGCUAAAGGAUGA
	siUSP14-10	CAAGAUGAAUGGAUUAAGU
	siUCHL5		P. Dickson, Cell Chem Biol 2020;(27):11
	siUCHL5-01	CCACCAGGAUGUCCAUUUA
	siUCHL5-03	GUUUAGAGCCUGAGAAUUU
	siUCHL5-04	GCAAAGAAAGCUCAGGAAA
	siUCHL5-05	GAUCAAGGUAAUAGUAUGU
